# Supplementary material for: FoxO1 in dopaminergic neurons regulates energy homeostasis and targets tyrosine hydroxylase
Source: PubMed Central journal article supplement (PMC5056402; doi:10.1038/ncomms12733), 2016-09-29
Supplement: ncomms12733-s1.pdf [file ncomms12733-s1.pdf]

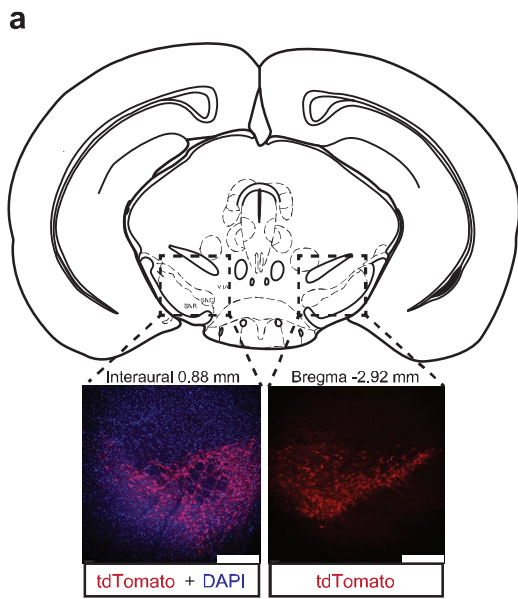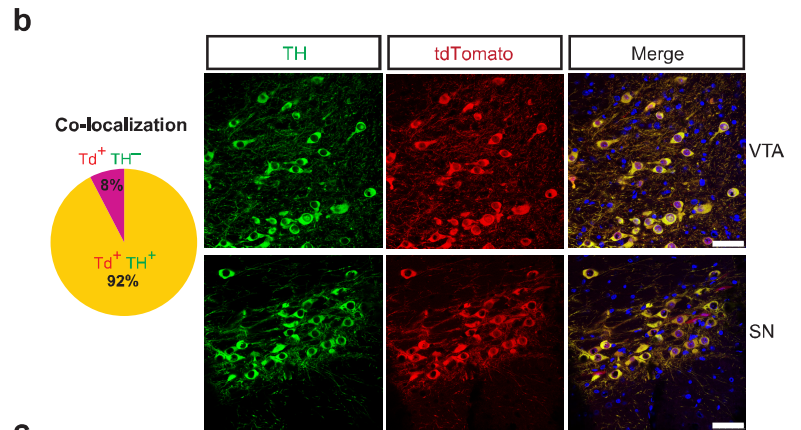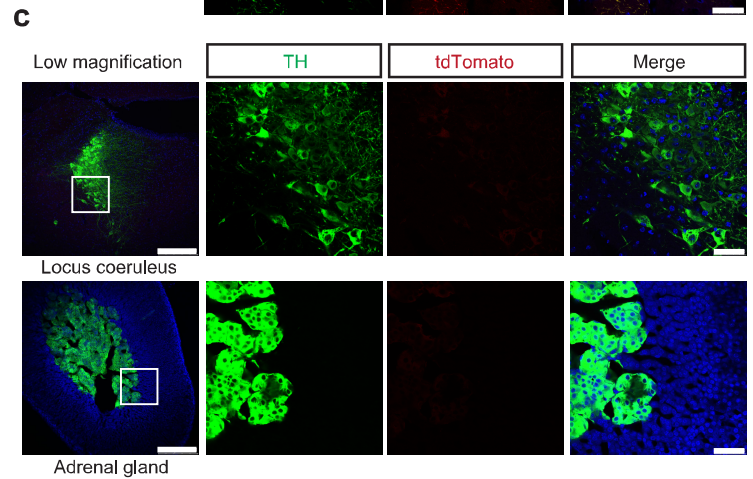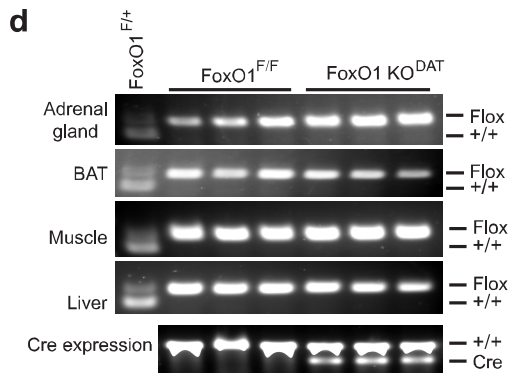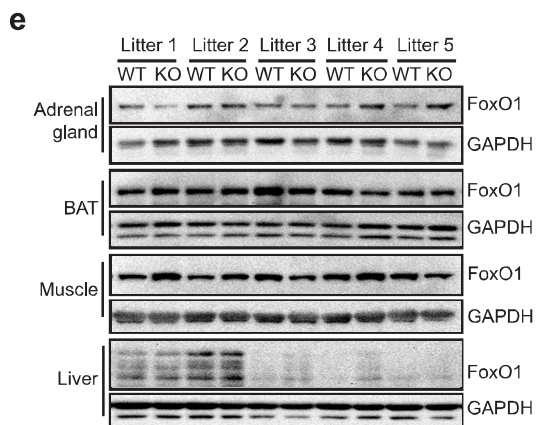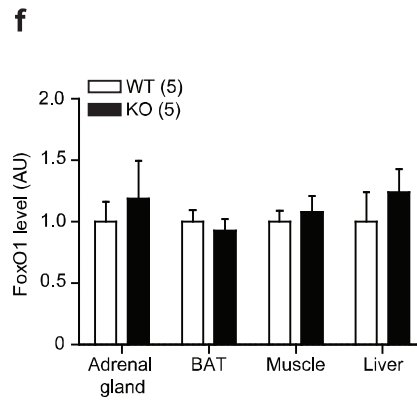

**Supplementary Figure 1. Validation of DA neuron-specific FoxO1 KO (FoxO1 KO<sup>DAT</sup>) mice.**

**a**, Cre expression in DA neurons of the midbrain of FoxO1 KO<sup>DAT</sup> mice. Scale bar, 250  $\mu$ m.

SNC, substantia nigra-compact part. SNR, substantia nigra-reticular part. VTA, ventral tegmental area.

**b, c**, Co-localization between DAT-cre expression (red) and TH-immunoreactive cells (green) of the midbrain (**b**), locus coeruleus and adrenals (**c**). Scale bar, 50  $\mu$ m (250  $\mu$ m at low magnification). Percentage of co-localization of DAT-cre expression and TH-positive cells in the midbrain is  $92.4 \pm 2.5\%$  (N=3).

**d**, Allele-specific PCR using indicated peripheral organs from FoxO1<sup>F/+</sup>, FoxO1<sup>F/F</sup>, and FoxO1 KO<sup>DAT</sup> (DAT-cre; FoxO1<sup>F/F</sup>).

**e**, Immunoblots for FoxO1 expression in indicated organs of WT and FoxO1 KO<sup>DAT</sup> littermates.

**f**, Densitometry for FoxO1 protein levels from (**e**).

The results are expressed as mean  $\pm$  SEM.

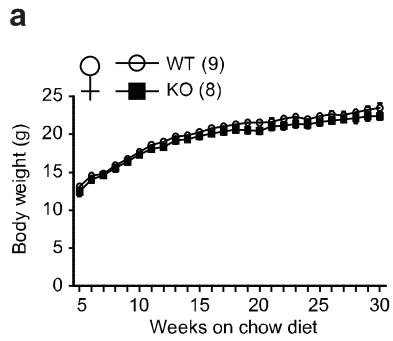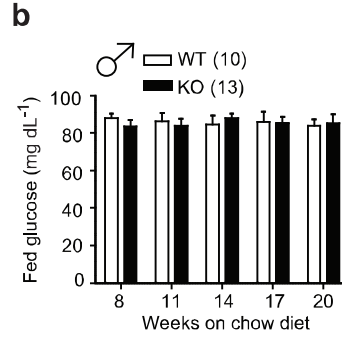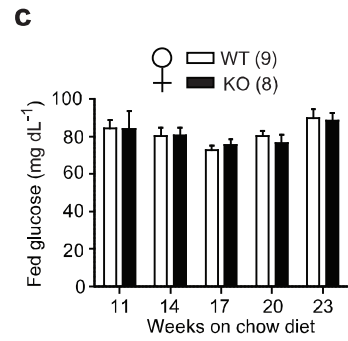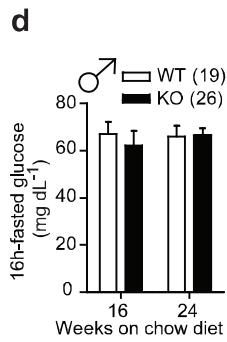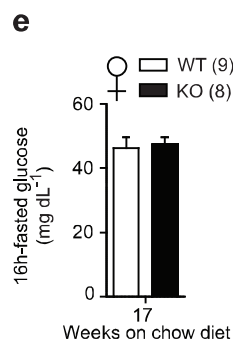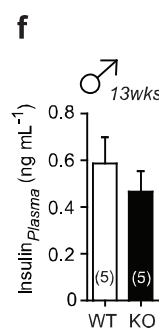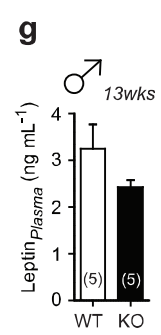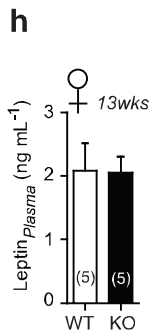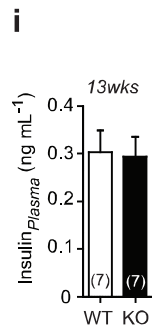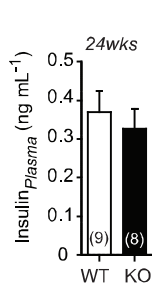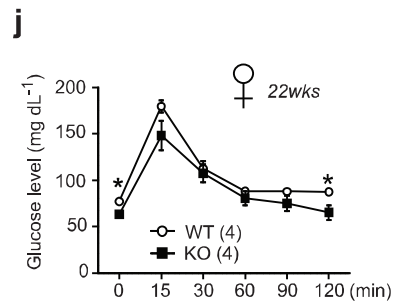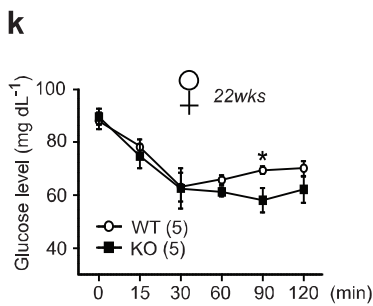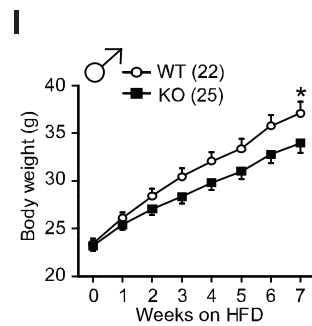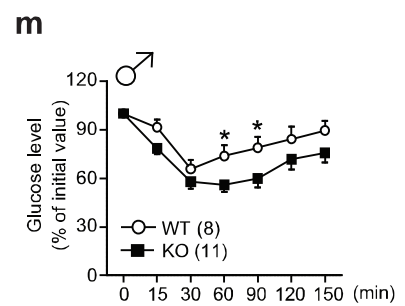

**Supplementary Figure 2. Metabolic phenotypes of FoxO1 KO<sup>DAF</sup> mice.**

**a**, Body weight of WT and KO female mice on chow diet.

**b, c, d, e**, Fed (**b** and **c**) and fasted (**d** and **e**) blood glucose of WT and KO mice on chow diet.

**f, g**, Plasma insulin (**f**) and leptin (**g**) levels of WT and KO male mice on chow diet.

**h, i**, Plasma leptin (**h**) and insulin (**i**) levels of WT and KO female mice on chow diet.

**j, k**, GTT (**j**) and ITT (**k**) of WT and KO female mice on chow diet.

**l**, Weekly body weight after HFD (HFD started at 8 weeks old). Data were combined from 4 cohorts.

**m**, ITT results from Figure 3g normalized to initial glucose levels.

♂, male. ♀, female. The results are expressed as mean ± SEM (\*P<0.05, Student's *t*-test for bar graphs and 2-way ANOVA for comparison of multiple time points in line graphs).

**a**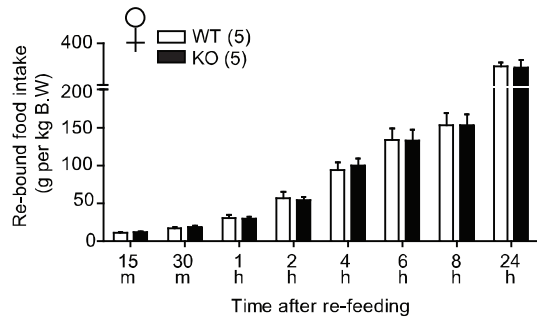**b**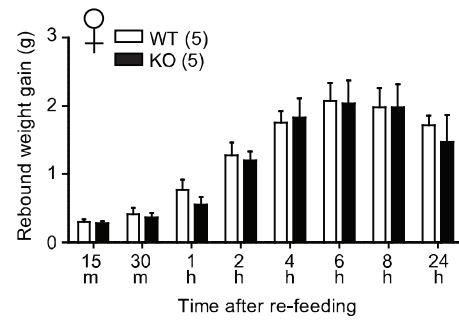**c**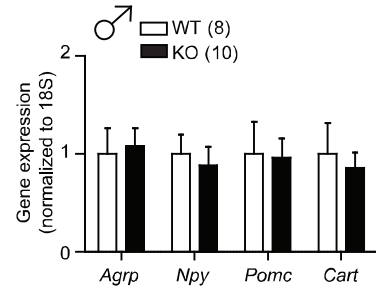**d**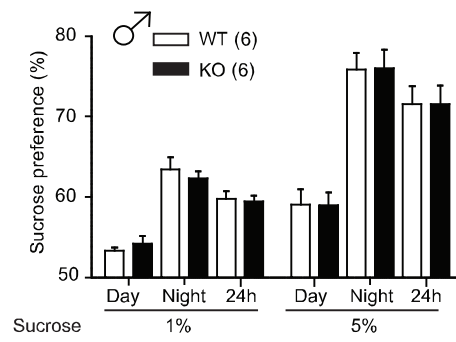**e**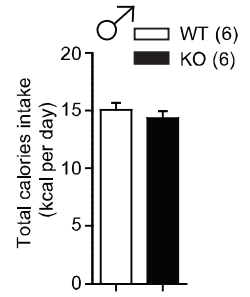

**Supplementary Figure 3. Feeding behavior of FoxO1 KO<sup>DAT</sup> mice.**

**a, b,** Rebound food intake (**a**) and rebound weight gain (**b**) of overnight fasted WT and KO female mice after re-feeding with normal chow.

**c,** Hypothalamic gene expression from WT and KO male mice.

**d,** Percentage of sucrose preference of WT and KO male mice. Two different sucrose concentrations (1 and 5%) were used.

**e,** Total calories intake of WT and KO male mice recorded during sucrose preference test.

♂, male. ♀, female. The results are expressed as mean ± SEM.

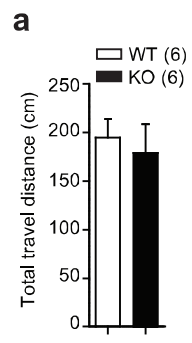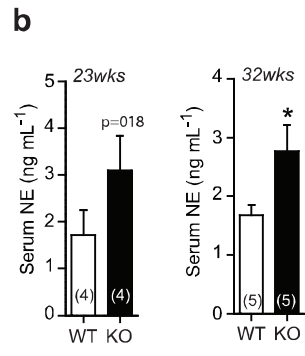

**Supplementary Figure 4. Increased energy expenditure and catecholamine levels in FoxO1**

**KO<sup>DAT</sup> mice.**

**a,** Locomotor activity of WT and KO male mice recorded from open field test.

**b,** Serum norepinephrine levels of WT and KO male mice fed normal chow at indicated age.

The results are expressed as mean  $\pm$  SEM (\*P<0.05, Student's *t*-test).



**a**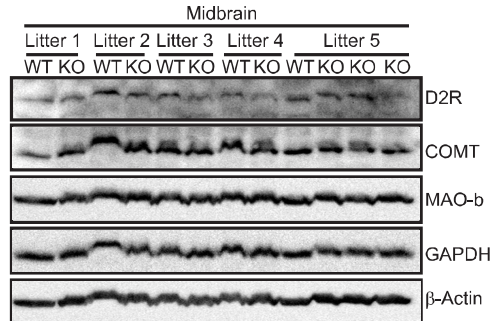**b**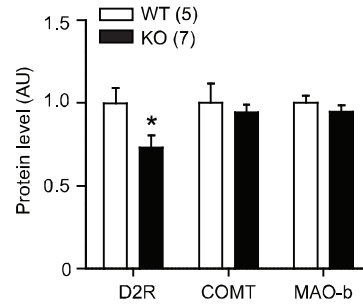**c**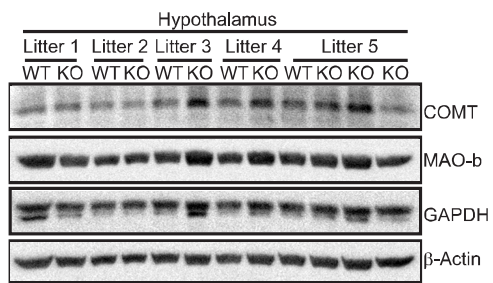**d**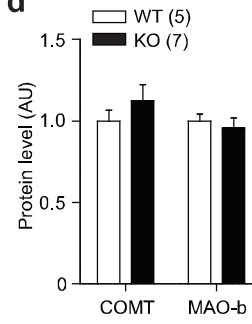**e**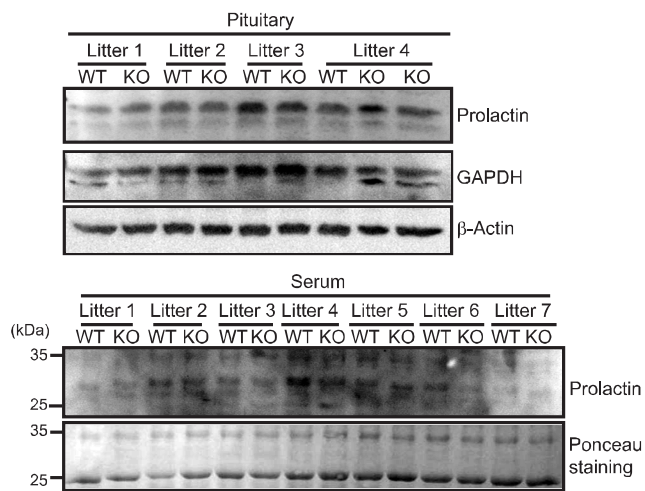**f**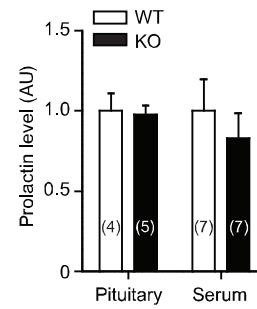

**Supplementary Figure 5. Expression of D2R, COMT, MAO-b and prolactin levels in FoxO1 KO<sup>DAT</sup> mice.**

**a, b**, Immunoblots (**a**) and relative protein levels (**b**) for D2R, COMT and MAO-b in midbrain samples of WT and KO mice.

**c, d**, Immunoblots (**c**) and relative protein levels (**d**) for COMT and MAO-b in hypothalamus of WT and KO mice.

**e, f**, Immunoblots (**e**) and relative prolactin levels (**f**) in the pituitary and serum samples of WT and KO mice.

The results are expressed as mean  $\pm$  SEM (\*P<0.05, Student's *t*-test).

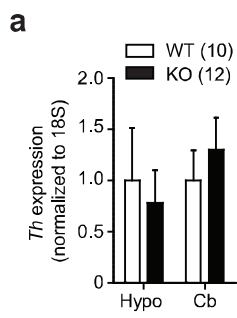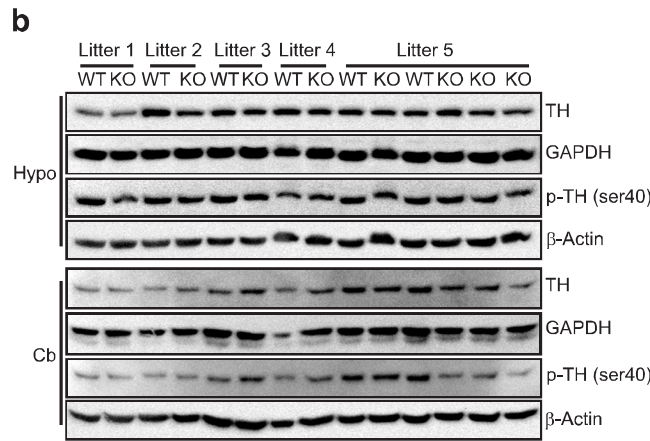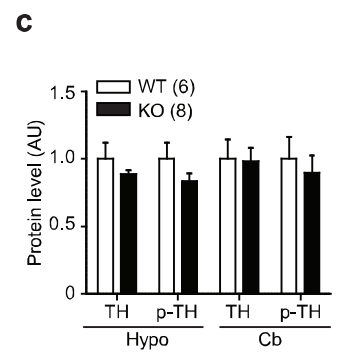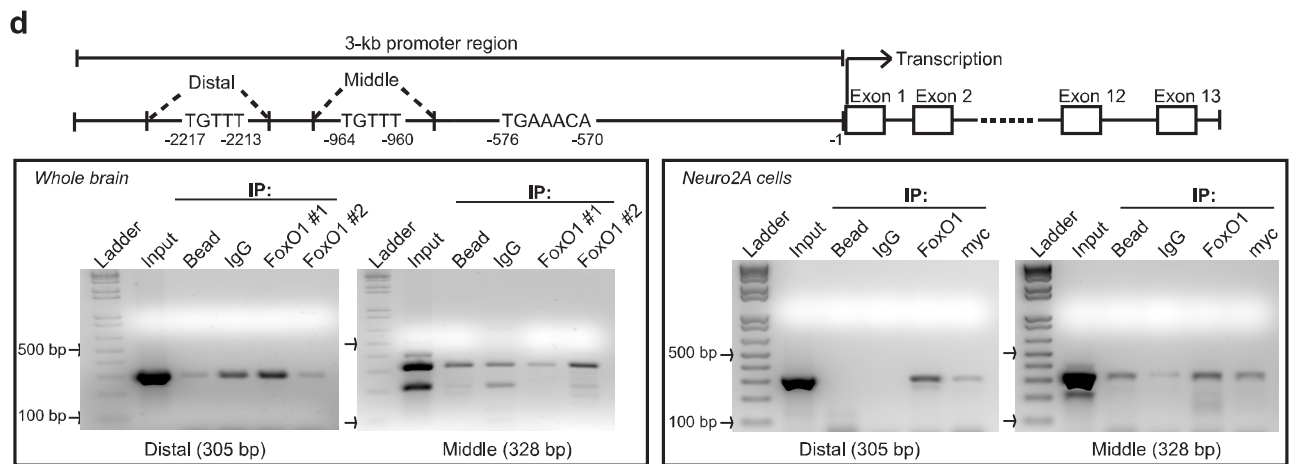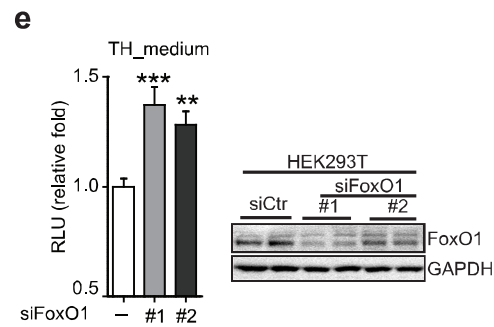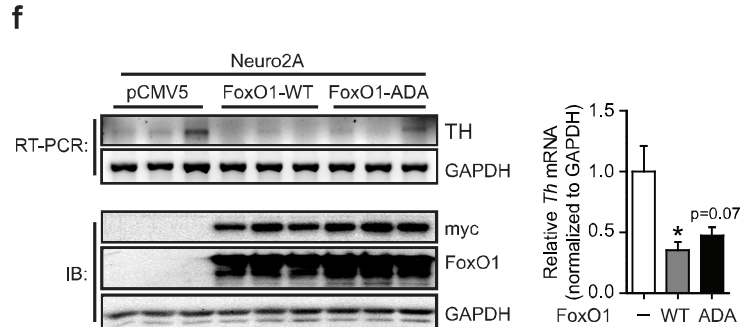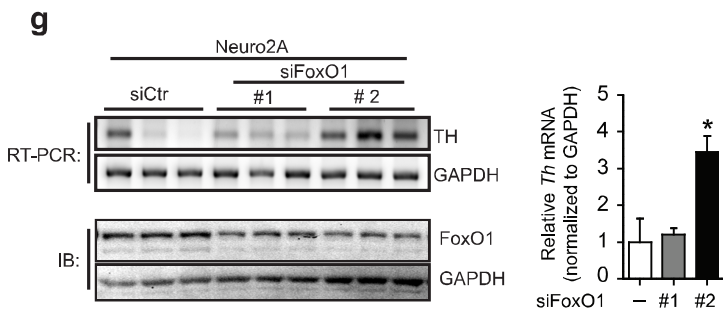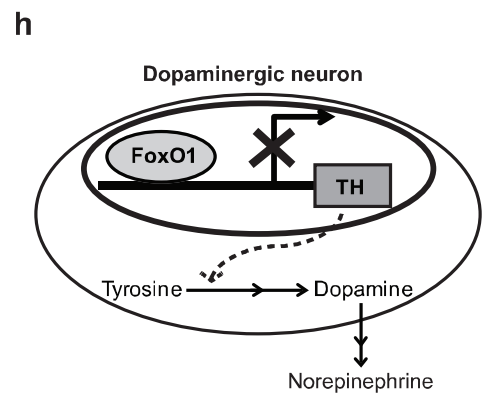

**Supplementary Figure 6. FoxO1 directly regulates tyrosine hydroxylase (TH) expression in DA neurons.**

**a**, mRNA level of *Th* in the hypothalamus (Hypo) and cerebellum (Cb) of WT and KO littermate mice.

**b**, Immunoblots of TH and phosphorylated TH (p-TH) in the hypothalamus and cerebellum of WT and KO littermate mice.

**c**, Relative TH and p-TH protein levels from (**b**).

**d**, Top, schematic diagram for mouse TH promoter. Bottom, ChIP assays using whole-brain and Neuro2A cells transfected with myc-tagged FoxO1-ADA showing a non-specific binding of FoxO1 on the distal and middle regions of TH promoter.

**e**, Left, relative luciferase activity after FoxO1 knockdown by specific siRNAs (N=12). Right, immunoblots confirming the specific FoxO1 knockdown. The experiment was replicated two times.

**f**, Upper left, RT-PCR results showing the effect of FoxO1-WT and -ADA overexpression on the expression of endogenous *Th* mRNA in Neuro2A cells. Lower left, immunoblots confirming the FoxO1-WT and -ADA expression. Right, densitometry for *Th* mRNA levels from RT-PCR (N=3).

**g**, Upper left, RT-PCR results showing the effect of FoxO1 knockdown on the expression of endogenous *Th* mRNA in Neuro2A cells. Lower left, immunoblots confirming FoxO1 knockdown. Right, Densitometry for *Th* mRNA levels from RT-PCR (N=3).

**h**, Schematic diagram depicting FoxO1 regulation of TH expression and catecholamine synthesis in DA neurons.

The results are expressed as mean  $\pm$  SEM (\*P<0.05, \*\*P<0.01, \*\*\*P<0.001, Student's *t*-test, one-way ANOVA for luciferase assays)

# Supplementary Figure 7. Full-gel blots

**Figure 1c**

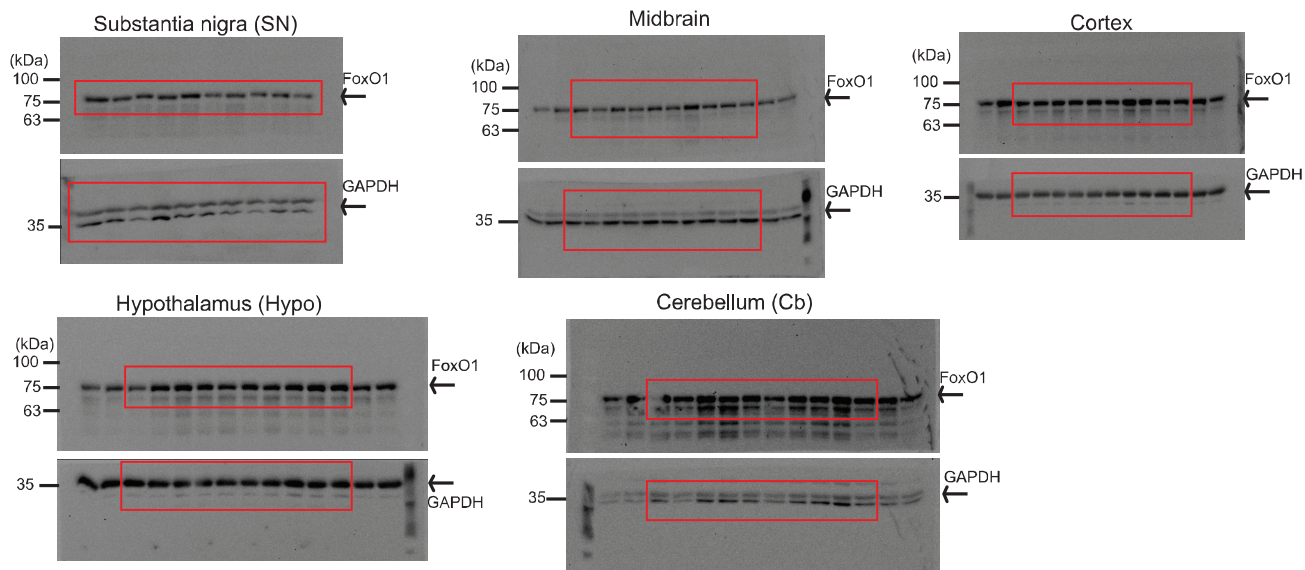

**Figure 6d**

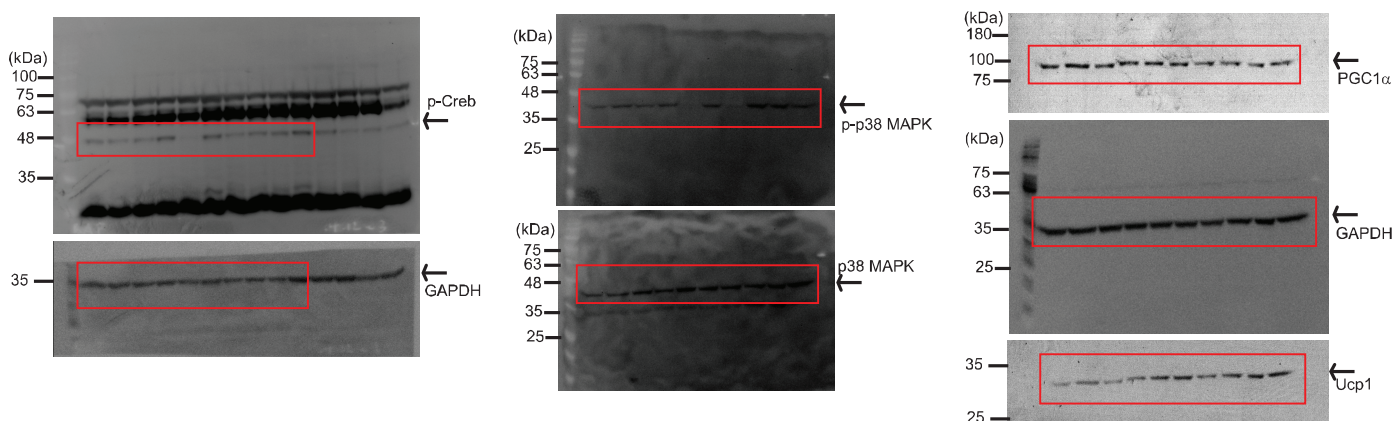

**Figure 7b**

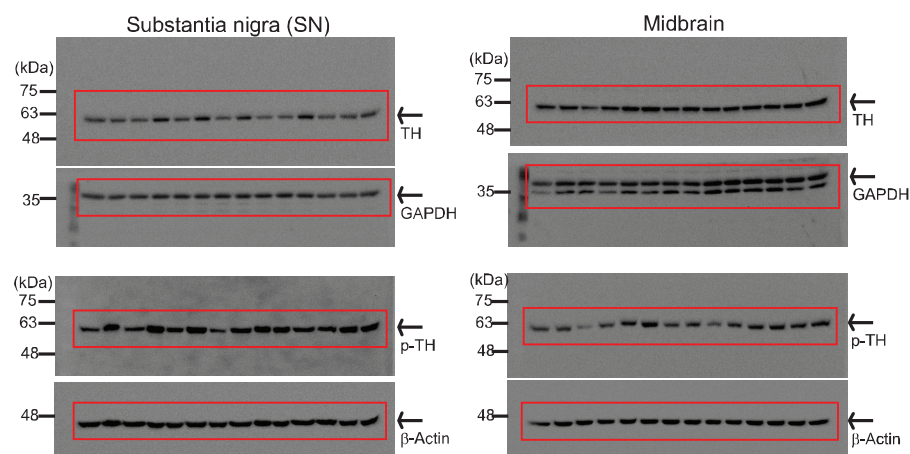

**Figure 7e**

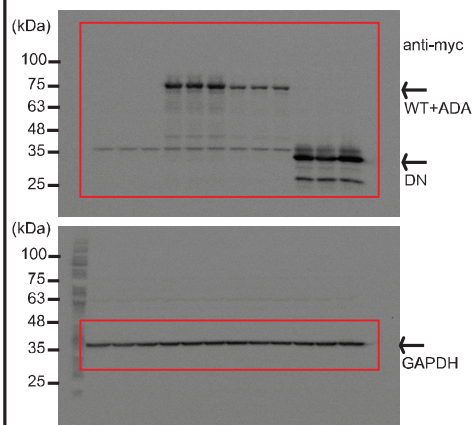

## Supplementary Figure 7. Full-gel blots (continued)

### Supplementary Fig. 1e

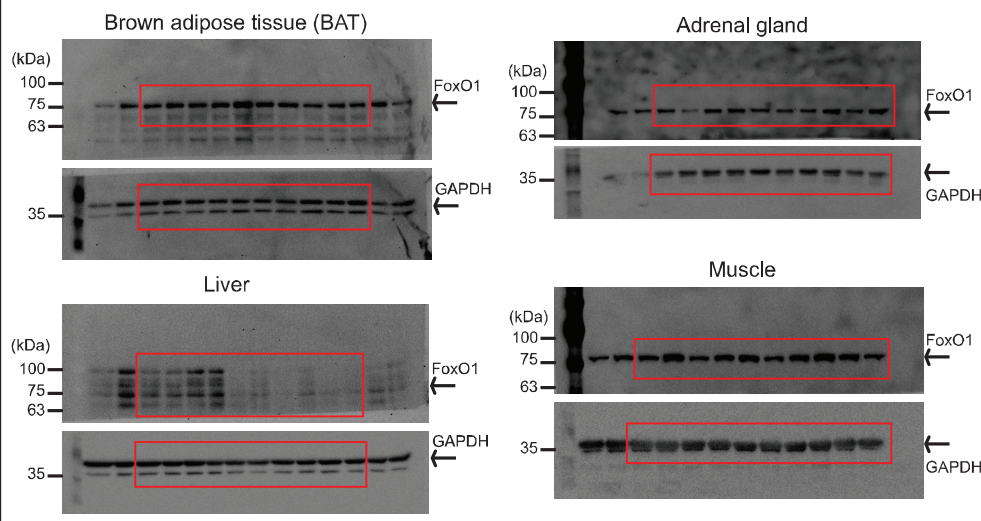

### Supplementary Fig. 5a

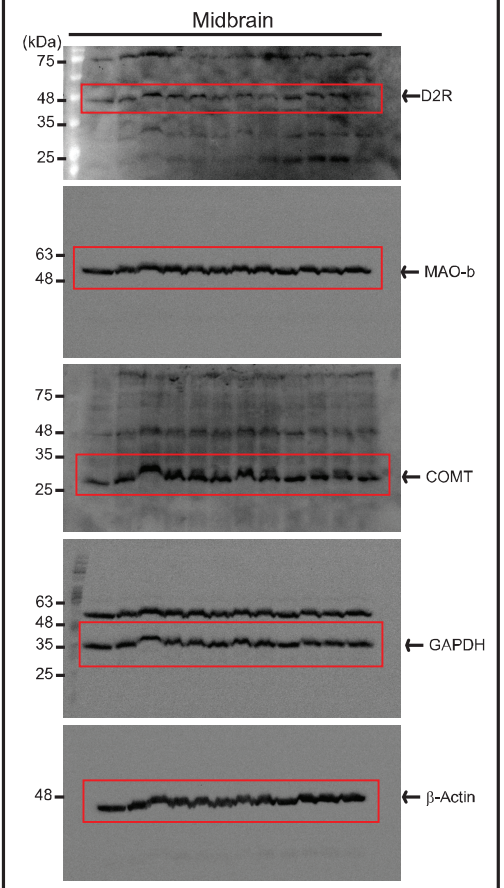

### Supplementary Fig. 5c

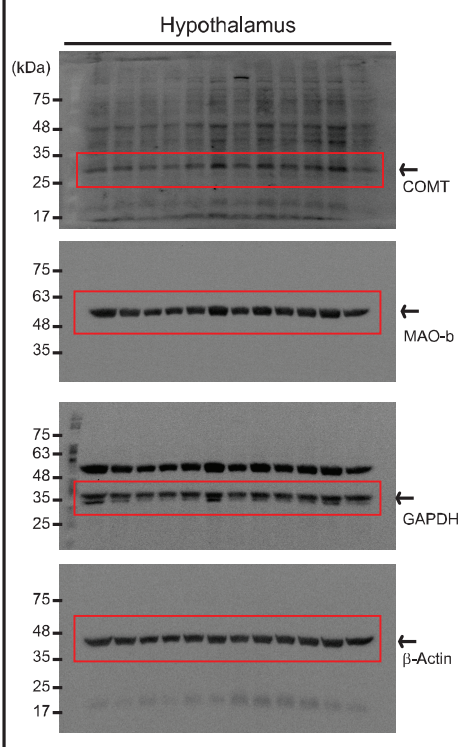

### Supplementary Fig. 5e

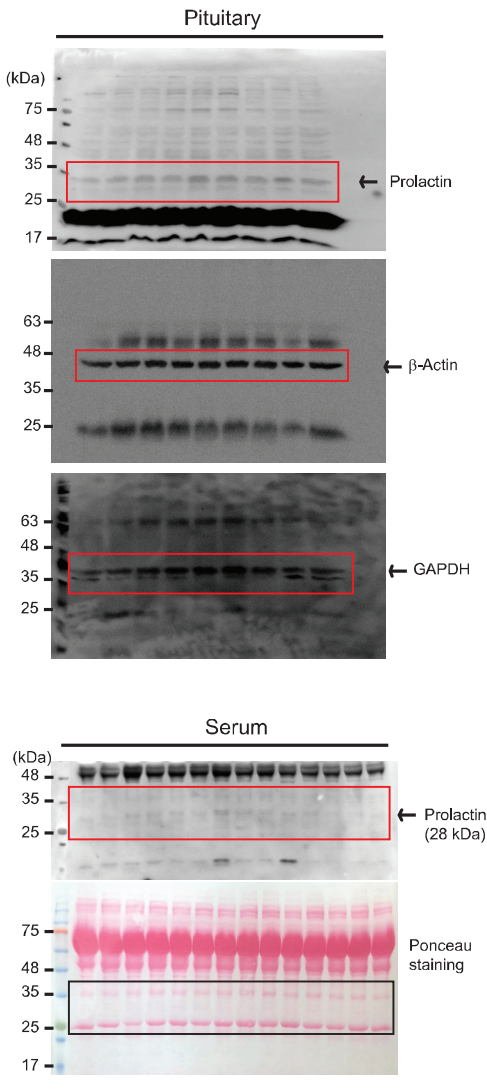

## Supplementary Figure 7. Full-gel blots (continued)

### Supplementary Fig. 6b

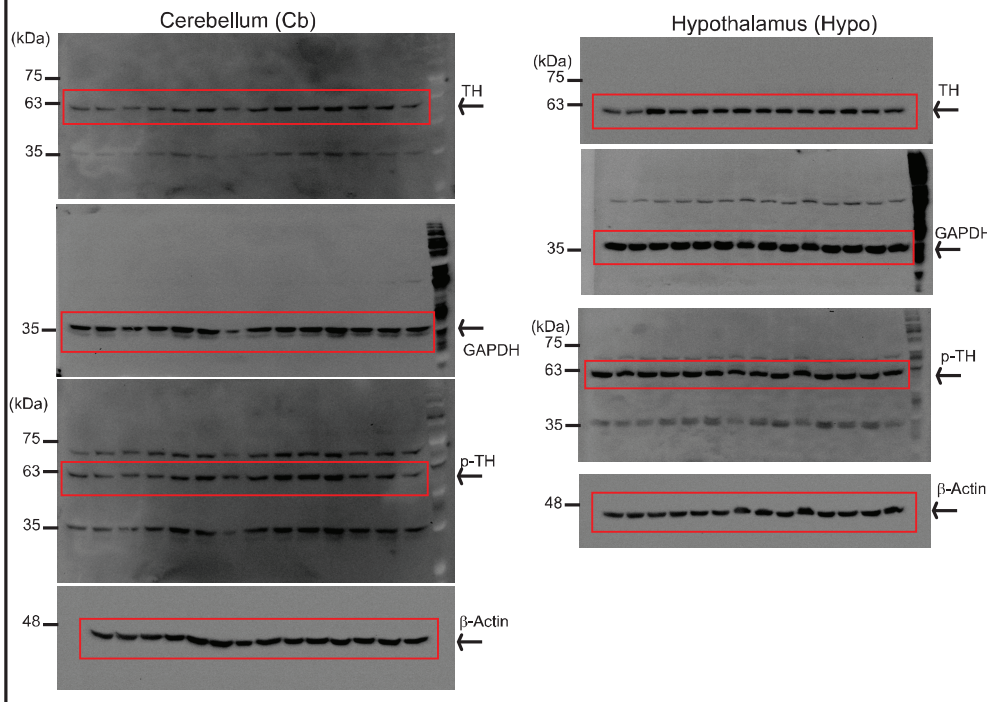

### Supplementary Fig. 6e

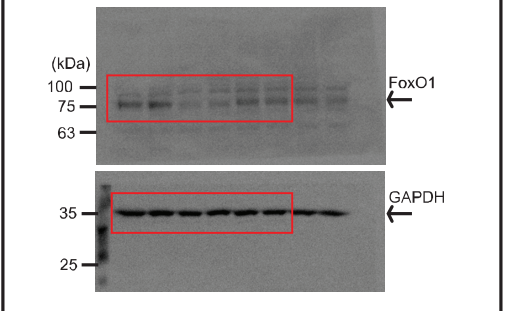

### Supplementary Fig. 6g

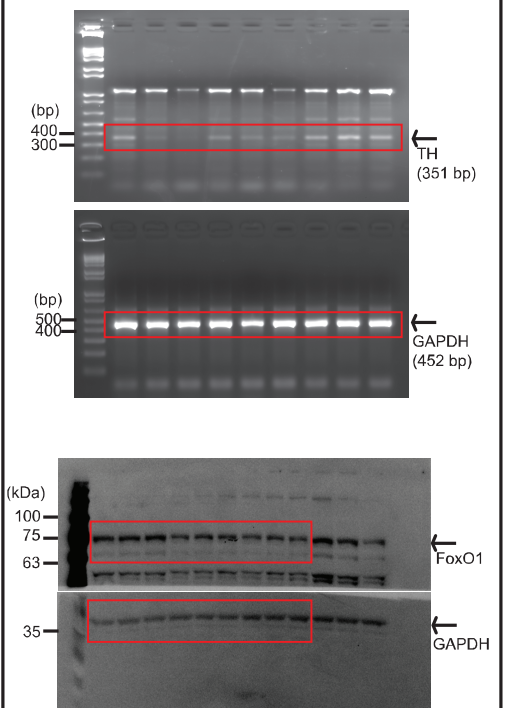

### Supplementary Fig. 6f

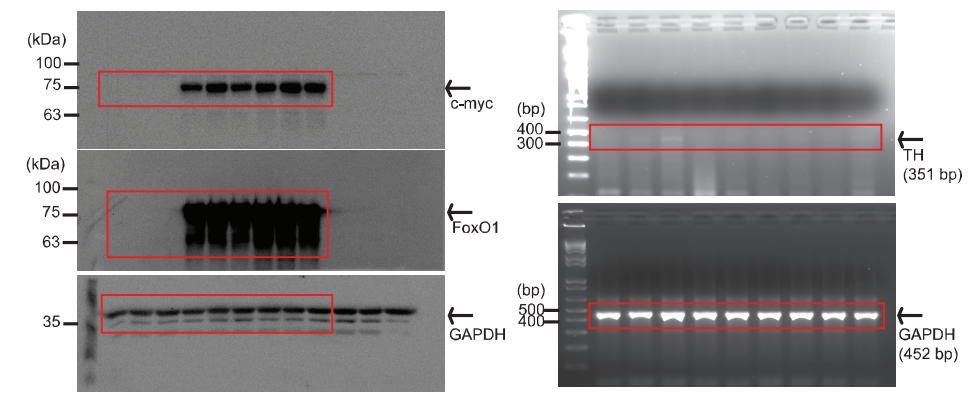



**Supplementary Table 1**

| <b>Sequences for mouse Q-PCR primers</b>  |                              |                               |                          |
|-------------------------------------------|------------------------------|-------------------------------|--------------------------|
| <b>Gene</b>                               | <b>Forward primer</b>        | <b>Reverse primer</b>         | <b>Product size (bp)</b> |
| 18S                                       | 5'-AACCCGTTGAACCCCAT-3'      | 5'-CCATCCAATCGGTAGTAGCG-3'    | 149                      |
| Adrb3                                     | 5'-TGAAACAGCAGACAGGGACA-3'   | 5'-GGCGTCCGTCTTGACTC-3'       | 102                      |
| AgRP                                      | 5'-CGGCCACGAACCTCTGTAG-3'    | 5'-CTCATCCCTGCCTTTGC-3'       | 65                       |
| CART                                      | 5'-AGAAGAAGTACGGCCAAGTC-3'   | 5'-GGACAGTCACACAGCTTCC-3'     | 91                       |
| NPY                                       | 5'-CTACTCCGCTCTGCGACT-3'     | 5'-AGTGTCTCAGGGCTGGATCTC-3'   | 75                       |
| PGC1 $\alpha$                             | 5'-AACCACACCCACAGGATCAGA-3'  | 5'-TCTTCGCTTTATTGCTCCATGA-3'  | 73                       |
| POMC                                      | 5'-CAGGTCCCTGGAGTCCGAC-3'    | 5'-CATGAAGCCACCCTAAGC-3'      | 102                      |
| TH                                        | 5'-TTGGCTGACCGCACATTT-3'     | 5'-GCCCCAGAGATGCAAGT-3'       | 69                       |
| Ucp1                                      | 5'-GGCCCTTGTAACAACAAAATAC-3' | 5'-GGCAACAAGAGCTGACAGTAAAT-3' | 67                       |
| Ucp3                                      | 5'-TTTCTGCGTCTGGGAGCTT-3'    | 5'-GGCCCTCTCAGTTGCTCAT-3'     | 63                       |
| Rps18<br>(mtDNA analysis)                 | 5'-TGTGTTAGGGACTGGTGGACA-3'  | 5'-CATCACCCACTTACCCCAAAA-3'   | 195                      |
| COX-2<br>(mtDNA analysis)                 | 5'-ATAACCGAGTCGTTCTGCCAAT-3' | 5'-TTTCAGAGCATTGGCCATAGAA-3'  | 180                      |
| <b>Sequences for mouse RT-PCR primers</b> |                              |                               |                          |
| <b>Gene</b>                               | <b>Forward primer</b>        | <b>Reverse primer</b>         | <b>Product size (bp)</b> |
| GAPDH                                     | 5'-ACCACAGTCCATGCCATCAC-3'   | 5'-TCCACCACCTGTTGCTGTA-3'     | 452                      |
| TH                                        | 5'-TACCGAGAGGACAGGATTCC-3'   | 5'-TTTACACAGCCCAAACTCCA-3'    | 351                      |
